# Supplementary material for: Effect of Medicaid Expansion on Health Insurance Coverage and Access to Care Among Adults With Depression
Source: Atypon-hosted journal article supplement (doi:10.1176/appi.ps.201800181), 2018-08-28
Supplement: appi.ps.201800181.ds001.pdf [file appi.ps.201800181.ds001.pdf]

Supplemental Appendix for:  
Health Reform and Adults with Depression: Changes in Coverage and Access to Care After  
Medicaid Expansion

## Appendix A. Eligibility screening questions and survey instrument

### I. SCREENER

#### INTRO

INTRO. Hello. My name is \_\_\_\_\_. I'm calling from SSRS and we're conducting research on behalf of the Harvard School of Public Health about important issues concerning health insurance in [INSERT STATE FROM SAMPLE]. Our questions are for research only and your answers are strictly confidential.

[IF ASKED]: Your telephone number was randomly chosen and your opinion will be used to represent [STATE] residents. There are no risks involved in participating in the survey and your participation in this study is completely voluntary. Your phone number is not linked to your answers, and your answers will always be combined with those of other people in [STATE]. You can skip any questions you don't want to answer and you can end the interview at any time. This interview takes about 13 minutes.

[ONLY IF RESPONDENT ASKS ABOUT OR OBJECTS TO COST OF CALL OR LOSS OF MINUTES DURING ANY PART OF THE INTERVIEW]: We are able to offer you ten dollars as reimbursement for the use of your cell phone minutes for this call. If you complete the full survey, I will ask for your mailing address at the end of the survey so we can send you a check. Is this OK? (CONTINUE)

#### (IF CELL PHONE SAMPLE)

CELL1. So we can ask you the right questions, could you please tell me if you are 18 or younger, older than 18 but younger than 65, or are you 65 or older?  
(ENTER ONE ONLY)

15/80

- |   |                       |                             |
|---|-----------------------|-----------------------------|
| 1 | 18 or younger         | THANK & TERM. RECORD TCELL1 |
| 2 | 19 to 64              | GO TO CELL2                 |
| 3 | 65 or older           | THANK & TERM. RECORD TCELL1 |
| 9 | (DO NOT READ) Refused | THANK & TERM. RECORD RCELL1 |

(IF CELL1=1,3 TERMINATE AS TCELL1)

(IF CELL1=9 TERMINATE AS RCELL1)

#### (IF CELL1=2)

CELL2. Before we continue, are you driving or doing anything that requires your full attention right now?

16/1

- |   |                                               |                             |
|---|-----------------------------------------------|-----------------------------|
| 1 | Yes, respondent is driving/doing something    | SET UP CALLBACK             |
| 2 | No, respondent is not driving/doing something | CONTINUE                    |
| 9 | (DO NOT READ) Refused                         | THANK & TERM. RECORD RCELL2 |

(IF CELL2=1: SET UP CALLBACK)

(IF CELL2=R: TERMINATE AS RCELL2)

(PN: IF LL, READ:"FIRST", IF CELL READ "AND")  
(ASK EVERYONE)

S1. (First/And), what state do you live in?

(DO NOT READ RESPONSE OPTIONS)

16/2

- 1 Arkansas
- 2 Kentucky
- 3 Texas
- 4 Louisiana
- 7 Another State THANK & TERM. RECORD TQS1
- 9 Refused THANK & TERM. RECORD RQS1

**(IF S1=7 TERMINATE AS TQS1)**

**(IF S1=R TERMINATE AS RQS1)**

**(IF S1=1,2,3)**

S2. Now I'd like to ask a few questions about your household: How many people, including yourself, counting adults and children, are living in your home? Please DO NOT include tenants or unrelated roommates.

[INTERVIEWER: IF RESPONDENT SAYS 10 OR MORE, RE-READ QUESTION AND CONFIRM]

16/3.2 (valid: 1-15)

- zz 16 or more
- RR (DO NOT READ) Refused

**(IF S2=2-15, zz)**

**(PN: DO NOT ASK IF Cell1=2; IF CELL1=2 GENERATE "1" AUTOMATICALLY FOR S3)**

**(PN: SHOW CODE zz ONLY IF S2=ZZ)**

S3. And how many of these family members, including you, are older than 18 but younger than 65?

16/5.2 (valid: 1-S2)

- 00 None
- zz 16 or more
- RR (DO NOT READ) Refused

IF S3 = 00 TERMINATE AS TQS3

IF S3=RR TERMINATE AS RQS3

**(IF S2=1)**

S3a. And are you 18 or younger, older than 18 but younger than 65, or are you 65 or older?

(ENTER ONE ONLY)

16/7

- 1 18 or younger
- 2 19 to 64
- 3 65 or older
- 9 (DO NOT READ) Refused

IF S3a=1,3 TERMINATE AS TQSS3a

IF s3a=9 TERMINATE AS RQS3a

**\*\*\* TABLE FOR POVERTY CALCULATION (BASED ON S2):**

| People in HH | Y1       | M1      |
|--------------|----------|---------|
| 1            | \$16,400 | \$1,370 |
| 2            | \$22,100 | \$1,840 |
| 3            | \$27,800 | \$2,320 |
| 4            | \$33,500 | \$2,790 |
| 5            | \$39,200 | \$3,270 |
| 6            | \$45,000 | \$3,750 |
| 7            | \$50,700 | \$4,220 |
| 8            | \$56,400 | \$4,700 |
| 9            | \$62,200 | \$5,180 |
| 10           | \$67,900 | \$5,660 |
| 11           | \$73,700 | \$6,140 |
| 12           | \$79,400 | \$6,620 |

**(IF S3=1-15, zz OR S3a=2)**

S4. Thinking about 2016, was your annual household income less than [Y1] or more than [Y1], before taxes and deductions are taken out? Please DO NOT include tenants or unrelated roommates.

**16/8**

- 1 Less than Y1
- 2 More than Y1
- 3 (DO NOT READ) Exactly Y1
- 8 (DO NOT READ) Don't know
- 9 (DO NOT READ) Prefer not to answer

(INTERVIEWER IF RESPONDENT IS RELUCTANT TO ANSWER: "I understand your concern. We just need to know if your household made more than or less than this amount in order to ask you the right questions. All your answers are strictly confidential. Your answer will be combined with the answers of thousands of other people")

IF s4=2,3 TERMINATE AS TQS4

IF [CELL PHONE OR (LL AND S2=1)] AND S4=R TERMINATE AS RQS4

**(IF S4=D)**

S4a. How about average monthly income? In 2016, was your average monthly household income less than [M1] or more than [M1], before taxes and deductions are taken out? Please DO NOT include tenants or unrelated roommates.

**16/9**

- 1 Less than M1
- 2 More than M1
- 3 (DO NOT READ) Exactly M1
- 8 (DO NOT READ) Don't know
- 9 (DO NOT READ) Prefer not to answer

IF s4a=2,3 TERMINATE AS TQS4a

[IF CELL PHONE OR (LL AND S2=1)] AND s4a=D TERMINATE AS TQS4a

[IF CELL PHONE OR (LL AND S2=1)] AND s4a=R TERMINATE AS RQS4a

**(IF LL AND S3=2+ AND [S4=R OR S4a=D,R])**

S4b. Is there someone else there you can ask?

**16/10**

- 1 Yes, coming to phone
- 2 Yes, but presently unavailable
- 3 No
- 9 (DO NOT READ) Refused

[IF S4b=1: RE-READ INTRO, THEN ASK S4]

[IF S4b=2: SUSPEND INTERVIEW KEEPING ALL DATA, GET NAME OF PERSON.  
CALLBACK

SHOULD START WITH INTRO, THEN ASK FOR THAT PERSON AND ASK S4]

[IF S4b=3 TERMINATE AS TQS4b]

[IF S4b=9 TERMINATE AS RQS4b]

**(PN: ASK FOR MALE 60% OF THE TIME; ASK FOR FEMALE 40% OF THE TIME)**

**(IF LL AND S3=2+ AND [S4=1 OR S4a=1])**

S5. To complete our survey we need to speak with the (male/female) family member living in your household, who is between the ages of 19 and 64 (and had the most recent birthday). Is that person at home right now?

(INTERVIEWER: IF RESPONDENT ASKS WHY DO YOU NEED TO TALK TO THE MALE/FEMALE WHO HAD THE LAST BIRTHDAY? SAY, "Our research experts set it up that way so that all types of people will be represented.")

**16/11**

- 1 Yes, respondent on the phone
- 2 Yes, respondent coming to the phone
- 3 Person is unavailable
- 4 No one in the HH of that gender
- 9 (DO NOT READ) Refused

IF S5=1 GO TO S5b

IF S5=2 READ INTRODUCTION AND GO TO S5b

IF S5=3 SUSPEND INTERVIEW KEEPING ALL DATA, and GET NAME OF PERSON.

CALLBACK SHOULD START WITH INTRO, THEN ASK FOR THAT PERSON AND ASK S5b

IF S5=9 TERMINATE AS RQS5

**(IF S5=4)**

S5a. Then may I please speak with the (female/male) (INSERT OPPOSITE GENDER FROM Q.S5) family member living in your household, who is between the ages of 19 and 64 and had the last birthday?

(INTERVIEWER: IF RESPONDENT ASKS WHY DO YOU NEED TO TALK TO THE MALE/FEMALE WHO HAD THE LAST BIRTHDAY? SAY, "Our research experts set it up that way so that all types of people will be represented.")

**16/12**

- 1 Yes, respondent on the phone
- 2 Yes, respondent coming to the phone

- 3 Person is unavailable
- 9 (DO NOT READ) Refused

IF S5a=1 GO TO S5b

IF S5a=2 READ INTRODUCTION AND GO TO S5b

IF S5a=3 SUSPEND INTERVIEW KEEPING ALL DATA, and GET NAME OF PERSON.

CALLBACK SHOULD START WITH INTRO, THEN ASK FOR THAT PERSON AND ASK S5b

IF S5a=9 TERMINATE AS RQS5a

S5b. Interviewer: record gender. If unclear ask: What is your gender?

**16/13**

- 1 Male
- 2 Female

**(ASK EVERYONE)**

S6. Just to confirm: What is your current age?

16/14.2 (19-64)

- 00 Under 19
- 65 65+
- RR Refused

(IF S6=00, 65 TERMINATE AS TS6)

**(IF S6=RR)**

S6a. Could you please tell me if you are...?  
(READ LIST)

(INTERVIEWER NOTE: IF RESPONDENT SAYS "YOUNGER THAN 19" OR "OLDER THAN 65" – PLEASE CONFIRM BEFORE ENTERING RESPONSE)

**16/16**

- 1 Younger than 19
- 2 19 to 25
- 3 26 to 34
- 4 35 to 44
- 5 45 to 64, or
- 6 65 OR OLDER
- 9 (DO NOT READ) Refused

(IF S6a=1, 6 TERMINATE AS TS6)

**(ASK IF S6a = R)**

S6b. Can you just confirm that you are older than 18 and younger than 65?

**16/17**

- 1 Yes
- 2 No
- 9 (DO NOT READ) Refused

(IF S6b = 2 TERMINATE AS TS6b)

(IF S6b = R TERMINATE AS RS6b)

(IF S6=19-64 OR S6a=2-5 OR S6b=1)

S7. Are you currently a US citizen, or not?

(INTERVIEWER: IF RESPONDENT IS RELUCTANT TO ANSWER: "Let me assure you that all your responses to this survey are confidential)

16/18

- 1 A US citizen
- 2 Not a US citizen
- 8 (DO NOT READ) Don't know
- 9 (DO NOT READ) Refused

(IF S7=2,D TERMINATE AS TS7)

(IF S7=R TERMINATE AS RS7)

**MAIN QUESTIONNAIRE:**

**II. Health Insurance Changes and Continuity of Care**

|    |           | <b>Marketplace Name</b>                                       | <b>Medicaid Program</b>                              |
|----|-----------|---------------------------------------------------------------|------------------------------------------------------|
| AR | Arkansas  | The Arkansas Health Connector                                 | Medicaid                                             |
| KY | Kentucky  | KYnect (pronounced: Connect) OR<br>The HealthCare.gov website | Medicaid, Kentucky Partnership<br>Program, or KenPAC |
| TX | Texas     | The HealthCare.gov website                                    | Medicaid, STAR, or<br>STAR+PLUS                      |
| LA | Louisiana | The HealthCare.gov website                                    | Medicaid, Healthy Louisiana, or<br>Bayou Health      |

(TREND: O1086 – Q1)

Q1. I am going to read a few common types of health insurance. For each one, please tell me 'yes' if you currently have it and 'no' if you don't. You can answer 'yes' more than once.

(P.N. – IF CODE 3 ENTERED, GO TO Q.2)

[INTERVIEWER: IF AT ANY POINT RESPONDENT SAYS "I DON'T HAVE ANY HEALTH INSURANCE": CONFIRM "DO YOU MEAN YOU HAVE NO HEALTH INSURANCE AT ALL"? IF YES, THAN ENTER CODE 3]

(P.N. –PLEASE DISPLAY THE FOLLOWING FOR ITEM g ONLY):

This **SHOULD NOT** include mentions i.e, Blue Cross Blue Shield, Aetna, Kaiser, or other insurance company names. If the respondent answers "yes" to this Q, you need to verify that the insurance is NOT an insurance that can be coded back to items a through f.

**PLEASE VERIFY BY ASKING:** "And this insurance is not a Medicaid or Medicare plan, a military health plan, a plan through an employer or union, a plan from the health insurance marketplace, or a plan that you bought directly from an insurance company, correct?"

(INTERVIEWER NOTE: IF THE R SAYS "Part D" this means a Medicare drug plan.)

PLEASE MAKE SURE THAT YOU ARE NOT JUST PUTTING A COMPANY NAME IN THE CODE BOX -YOU NEED TO FIND OUT EXACTLY WHAT TYPE OF INSURANCE THIS IS.

- 1 Yes, currently have it
- 2 No, do not have it
- 3 (DO NOT READ) You do not have any kind of health insurance
- 8 (DO NOT READ) Don't know
- 9 (DO NOT READ) Refused/prefer not to answer

- 16/21** a. [State Medicaid Plan Name] (INTERVIEWER NOTE: Clarify, if needed, "Medical Assistance or government-assistance plan for those with low incomes or a disability")
- 16/22** b. Medicare (INTERVIEWER NOTE: Clarify, if needed, "for people 65 and older, or people with certain disabilities")
- 16/23** c. A military health care plan, such as TRI-CARE, CHAMPUS, or CHAMP-VA
- 16/24** d. A health plan you got through an employer or union (INTERVIEWER NOTE: This also includes through a spouse's employer or union)
- 19/1** e. A health insurance plan that you signed up for through [State Marketplace Name] or a health insurance Marketplace created by the national health reform law. (INTERVIEWER NOTE: If respondent says "do you mean Obamacare or ACA," then say: "The national health reform law is sometimes referred to as Obamacare or the Affordable Care Act")
- 16/25** f. A health plan that you bought directly from an insurance company, not through an employer or union, and not through a health insurance Marketplace
- 16/26** g. Some other kind of health insurance I haven't already mentioned (SPECIFY TYPE: 19/2 )

(TREND: O1086-Q1h)

(ASK IF Q1a-g=2,8,9 TO ALL)

Q1h. Does this mean you have no health insurance of any kind?

**16/27**

- 1 Yes, have health insurance (SPECIFY TYPE: 16/28 )
- 2 No, do not have health insurance of any kind
- 8 (DO NOT READ) Don't know/no opinion
- 9 (DO NOT READ) Refused/prefer not to answer

[PN: CREATE VARIABLE INSURED: **16/29**

IF Q1=1 FOR ANY ITEM OR Q1h=1, INSURED=1. → "INSURED"

IF Q1=3 OR Q1h=2, INSURED=0. → "NOT INSURED"

IF Q1=D,R FOR ALL ITEMS OR Q1h=D or R, INSURED=9] → "DON'T KNOW/REFUSED"

(TREND: M1115 Q11/N1081 Q11/O1068-Q2)

Q2. How many times have you lost or changed your medical insurance in the past 12 months? By this I mean any change in your insurance status, including losing insurance, gaining new insurance, or switching insurance plans.

(ENTER ONE ONLY)

(READ LIST)

**19/3**

- 1 Zero changes
- 2 One change
- 3 Two or more changes
- 8 (DO NOT READ) Don't know
- 9 (DO NOT READ) Refused/prefer not to answer

(NEW)



**(ASK EVERYONE)**

**(ROTATE VERBIAGE IN PARENS)**

**(P.N. – ROTATE STUBS IN SAME ORDER AS QUESTION)**

12. Under the national health reform law, sometimes referred to as Obamacare or the Affordable Care Act, many Americans have new choices for obtaining health insurance. The law created health insurance Marketplaces, called [State Marketplace Name] in your state, where people can buy insurance, and some may be eligible for subsidies to help pay for coverage. Also, some states have expanded Medicaid. So far, would you say the health care law has directly (helped) you, directly (hurt) you, or has it not had a direct impact?

(INTERVIEWER NOTE: THIS Q IS ABOUT IMPACT ON THE RESPONDENT PERSONALLY AND DOES NOT INCLUDE FAMILY MEMBERS)

- 1 Helped
- 2 Hurt
- 3 No direct impact
- 4 (DO NOT READ) Both helped and hurt
- D (DO NOT READ) Don't know/no opinion
- R (DO NOT READ) Refused/prefer not to answer

### **III. Health Care Access and Utilization**

**(TREND: M1115 Q13/N1081 –Q13/O1086 –Q13)**

- Q13. Is there one person you think of as your personal doctor or health care provider, or not?

[IF RESPONDENT ANSWERS “NO”, ASK CLARIFICATION: “Does that mean there is more than one person, or is there no person who you think of as your personal doctor or health care provider”]

**17/19**

- 1 Yes, only one
- 2 Yes, more than one
- 3 No person
- 8 (DO NOT READ) Don't know
- 9 (DO NOT READ) Refused/prefer not to answer

**(M1115 Q.14/N1081 – Q14/O1086-Q14)**

- Q14. What is the **main** location you normally go to, to receive medical care?

[READ IF NECESSARY: By medical care, I am not including dental services or routine vision services, like glasses or contact lenses. I am also not including visits to the pharmacy, if all you are doing is buying medication.]

(READ LIST. ENTER ONE ONLY)

**17/20.10**

- 1 A private doctor's office
- 2 A public health clinic or community health center (IF NEEDED: This includes the VA or IHS/tribal clinic)
- 3 A hospital-based clinic
- 4 A walk-in clinic in a store, such as Walmart or a pharmacy
- 5 An Emergency Room
- 17/29 7 Someplace else (SPECIFY): 17/30
- 0 You don't have a usual place of care

- 8 (DO NOT READ) Don't know
- 9 (DO NOT READ) Refused/prefer not to answer

**(M1115 Q.15/N1081 – Q15/O1086 – Q15)**

**(ASK EVERYONE)**

15. In the past 12 months, have you had a hard time getting an appointment when you needed it with a general doctor or primary care physician, or not?

**17/31**

- 1 Yes
- 2 No
- 8 (DO NOT READ) Don't know
- 9 (DO NOT READ) Refused/prefer not to answer

**(M1115 Q.16/N1081 – Q16/O1086 Q16)**

**(ASK EVERYONE)**

- Q16. In the past 12 months, have you had a hard time getting an appointment when you needed it with a specialist, or not?

**17/32**

- 1 Yes
- 2 No
- 8 (DO NOT READ) Don't know
- 9 (DO NOT READ) Refused/prefer not to answer

**(M1115 Q.17 – N1081 – Q17/O1086 –Q17)**

**(ASK EVERYONE)**

- Q17. In the past 12 months, how many times have you gotten care in an ambulatory (AM-byou-latory), or outpatient setting? This could include a doctor's office, an urgent care or walk-in clinic, or similar. Do not include emergency room visits or hospitalizations.

17/33.2 # OF TIMES (VALID: 1-97)

- NN None
- DD (DO NOT READ) Don't know
- RR (DO NOT READ) Refused/prefer not to answer

**(M1115 Q.17a/N1081 – Q17a/O1086 – Q17a)**

**(ASK IF Q17=DD)**

- 17a. If you were giving your best guess, would you say it was...?

(IF NECESSARY Thinking about the past 12 months.)

(READ LIST. ENTER ONE ONLY)

**17/35**

- 1 Zero times
- 2 Once
- 3 Twice
- 4 Three or four times
- 5 Five or more times
- 8 (DO NOT READ) Don't know
- 9 (DO NOT READ) Refused/prefer not to answer

**(M1115 Q.18/N1081 Q18/O1086 – Q18)**

Q18. In the past 12 months, how many times have you visited an Emergency Room to receive care?

17/36.2 # OF TIMES (VALID: 1-97)

NN None

DD (DO NOT READ) Don't know

RR (DO NOT READ) Refused/prefer not to answer

**(M1115 Q.18a/ N1081 – Q18a/O1086-Q18a)**

**(ASK IF Q18=DD)**

18a. If you were giving your best guess, would you say it was...?

(IF NECESSARY Thinking about the past 12 months.)

(READ LIST. ENTER ONE ONLY)

**17/38**

1 Zero times

2 Once

3 Twice

4 Three or more times

8 (DO NOT READ) Don't know

9 (DO NOT READ) Refused/prefer not to answer

**(M1115 Q.19/ N1081 – Q19/O1086-Q19)**

**(ASK EVERYONE)**

Q19. In the past 12 months, have you been admitted to stay in a hospital overnight at least once?

**17/39**

1 Yes

2 No

8 (DO NOT READ) Don't know

9 (DO NOT READ) Refused/prefer not to answer

**(M1115 Q.20/N1081 – Q20/O1086-Q20)**

**(ASK EVERYONE)**

Q20. Altogether, how much would you estimate you have spent total out-of-pocket for your medical care over the past 12 months? By out-of-pocket, I mean money that you paid yourself, possibly with help from family or friends. This includes money paid for doctors' visits, emergency room visits, hospitalizations, tests, or medications. You can just give me your best guess. Would you say it was...?

(READ LIST. ENTER ONE ONLY)

**17/40**

1 Less than \$50

2 \$50 to less than \$100

3 \$100 to less than \$200

4 \$200 to less than \$500

5 \$500 to less than \$1,000

6 \$1,000 or more

8 (DO NOT READ) Don't know

9 (DO NOT READ) Refused/prefer not to answer

**(M1115 Q.21/N1081 – Q21/O1086-Q21)**

Q21. Overall, how would you rate the quality of the medical care you have received in the last 12 months? Would you say it was...?

(READ LIST. ENTER ONE ONLY)

17/41

- 1 Excellent
- 2 Very Good
- 3 Good
- 4 Fair
- 5 Poor
- 6 (DO NOT READ) Did not receive any medical care in past 12 months
- 8 (DO NOT READ) Don't know
- 9 (DO NOT READ) Refused/prefer not to answer

(M1115 Q.22/N1081 – Q22/O1086-Q22)

(P.N. – IF Q.18 = NN OR Q.18a = 1, GEN IN CODE 2 WITHOUT ASKING)

22. In the last 12 months, did you ever have to go to an Emergency Room because you could not find a doctor who could see you in their office when you needed care?

17/42

- 1 Yes
- 2 No
- 8 (DO NOT READ) Don't know
- 9 (DO NOT READ) Refused/prefer not to answer

(M1115 Q.23/N1081 Q23/O1086 – Q23)

(ASK EVERYONE)

Q23. At any time in the last year, have you waited to seek medical care or chosen not to seek medical care for an illness, injury, or condition because you couldn't afford it?

17/43

- 1 Yes
- 2 No
- 8 (DO NOT READ) Don't know
- 9 (DO NOT READ) Refused/prefer not to answer

(M1115 Q.24/N1081 – Q24/O1086 –Q24)

(ASK EVERYONE)

Q24. At any time in the last year, have you ended up taking less medication than was prescribed for you because you couldn't afford it? This includes skipping doses, or taking a smaller dose than was prescribed, or not filling a prescription right away.

17/44

- 1 Yes
- 2 No
- 8 (DO NOT READ) Don't know
- 9 (DO NOT READ) Refused/prefer not to answer

#### IV. Economic Circumstances

(M1115 Q.25/N1081 – Q25/O1086 –Q25)

(ASK EVERYONE)

Q25. In the past year, have you either had to borrow money, or skip paying medical bills, or skip paying other bills as a result of medical costs?

17/45

- 1 Yes
- 2 No
- 8 (DO NOT READ) Don't know
- 9 (DO NOT READ) Refused/prefer not to answer

#### V. Preventive care-indicators

(M1115 Q.26/N1081 – Q26/O1086-Q26)

(ASK EVERYONE)

Q26. Have you had your cholesterol checked in the last 12 months, or not?

17/46

- 1 Yes
- 2 No
- 8 (DO NOT READ) Don't know
- 9 (DO NOT READ) Refused/prefer not to answer

(M1115 Q.27/N1081 – Q27/O1086-Q27)

(ASK EVERYONE)

Q27. Have you had a blood sugar test for diabetes in the last 12 months, or not?

17/47

- 1 Yes
- 2 No
- 8 (DO NOT READ) Don't know
- 9 (DO NOT READ) Refused/prefer not to answer

(M1115 Q.28/N1081 – Q28/O1086-Q28)

(ASK EVERYONE)

Q28. Have you had a routine checkup in the last 12 months, or not? A routine checkup is a general physical exam, not an exam for a specific injury, illness, or condition?

17/48

- 1 Yes
- 2 No
- 8 (DO NOT READ) Don't know
- 9 (DO NOT READ) Refused/prefer not to answer

#### VI. Health Status, Functionality, and Outcomes

READ TO EVERYONE: These last questions ask broadly about your general health and well-being.

(M1115 Q.29/N1081 – Q29/O1086-Q29)

(ASK EVERYONE)

29. Overall, how would you rate your health during the past 12 months? Would you say it has been...?

(READ LIST. ENTER ONE ONLY)

17/49

- 1 Excellent
- 2 Very Good
- 3 Good

- 4 Fair
- 5 Poor
- 8 (DO NOT READ) Don't know
- 9 (DO NOT READ) Refused/prefer not to answer

**(M1115 Q.30/N1081 – Q30/O1086-Q30)**

**(ASK EVERYONE)**

(SCRAMBLE a-i)

Q30. I am going to read a list of medical conditions. For each, please indicate if you have ever been told by a doctor or other health professional that you have had that condition. How about (INSERT)?

[IF NECESSARY: Have you ever been told by a doctor or other health professional that you have had this condition?]

- 1 Yes, have been told
- 2 No, have not been told
- 8 (DO NOT READ) Don't know
- 9 (DO NOT READ) Refused/prefer not to answer

- 17/61 a. High blood pressure
- 17/62 b. A heart attack, coronary (CORE-ro-nary) artery disease, or heart failure
- 17/63 c. A stroke
- 17/64 d. Asthma, chronic bronchitis, COPD, or emphysema (EM-fah-zee-ma)
- 17/65 e. Chronic kidney disease or dialysis
- 17/66 f. Diabetes
- 17/67 g. Depression or anxiety
- 17/68 h. Cancer, except for skin cancer
- 17/69 i. Alcoholism or drug addiction

**(M1115 Q.3/N1081Q31/o1086-Q31)**

**(ASK IF Q30a-i=1 TO ANY)**

**(PN: INSERT “a/your condition” (Q.30 = 1 TO ONE ITEM ONLY)**

**(PN:INSERT “more than one/any of these conditions” (Q.30 = 1 TO MORE THAN 1 ITEM)**

Q31. You mentioned that you have (a/more than one) health problem or diagnosed condition. In the last 12 months, have you regularly seen or communicated with a doctor or other healthcare provider in order to treat (your condition/any of these conditions)? This does not include the Emergency Room.

17/71

- 1 Yes
- 2 No
- 8 (DO NOT READ) Don't know
- 9 (DO NOT READ) Refused/prefer not to answer

READ TO EVERYONE: The next two questions will ask you to think specifically about how you have felt over the past two weeks.

**(M1115/N1081 Q.32/P1086-Q32)**

**(ASK EVERYONE)**

Q32. Over the past two weeks, how often have you been bothered by having little interest or pleasure in doing things?

(ENTER ONE ONLY)

(READ LIST)

**17/72**

- 0 Not at all
- 1 Several days
- 2 More than half the days
- 3 Nearly every day
- 8 (DO NOT READ) Don't know
- 9 (DO NOT READ) Refused/prefer not to answer

**(M1115/N1081 Q.33/O1086-Q33)**

**(ASK EVERYONE)**

Q33. Over the past two weeks, how often have you been bothered by feeling down, depressed, or hopeless?

(ENTER ONE ONLY)

(READ LIST)

**17/73**

- 0 Not at all
- 1 Several days
- 2 More than half the days
- 3 Nearly every day
- 8 (DO NOT READ) Don't know
- 9 (DO NOT READ) Refused/prefer not to answer

### **Demographics**

READ: These final questions are just to help us better understand the people participating in this survey.

**(M1115/N1081 Q.D1/O1086-D1)**

**(ASK EVERYONE)**

D1. Are you currently married, living with a partner, widowed, divorced, separated, or single?

(ENTER ONE ONLY)

(INTERVIEWER NOTE: IF RESPONDENT SAYS THEY FIT INTO MORE THAN 1 CATEGORY, THEY SHOULD PICK THE CATEGORY THAT APPLIES TO THEM MOST RECENTLY)

**17/74**

- 1 Married
- 2 Living with a partner
- 3 Widowed
- 4 Divorced
- 5 Separated
- 6 Single
- 9 (DO NOT READ) Refused

**(M1115/N1081 Q.D2/O1086 D2)**

**(ASK EVERYONE)**

D2. What is the last grade or class that you completed in school?

(DO NOT READ LIST; PROBE FOR CLARITY IF NECESSARY)

(INTERVIEWER NOTE: A 2 year college degree (for example an Associates degree) should go under code 3)

**17/75**

- 1 Less than high school (grades 1-11, grade 12 but no diploma)
- 2 High school graduate or equivalent (e.g. GED)
- 3 Some college but no degree (incl. 2 year occupational or vocational programs)
- 4 College graduate (e.g. BA, AB, BS)
- 5 Postgraduate (e.g. MA, MS, MEng, Med, MSW, MBA, MD, DDs, PhD, JD, LLB, DVM)
- 8 (DO NOT READ) Don't know
- 9 (DO NOT READ) Refused

**(M1115/N1081 Q.D3/O1086 – D3)**

**(ASK EVERYONE)**

D3. Are you, yourself, of Latino or Hispanic origin or descent, such as Mexican, Puerto Rican, Cuban, or some other Latin American background?

**17/76**

- 1 Yes
- 2 No
- 8 (DO NOT READ) Don't know
- 9 (DO NOT READ) Refused

**(M1115/N1081 Q.D4/O1086-D4)**

**(ASK EVERYONE)**

D4. What is your race? Are you white, black or African American, Asian, American Indian or Alaska Native, or Native Hawaiian or other Pacific Islander? You may select more than one race.

(ACCEPT MULTIPLE RESPONSES)

**17/77.6**

- 1 White
- 2 African American/Black
- 3 Asian
- 4 American Indian or Alaska Native
- 5 Native Hawaiian or other Pacific Islander
- 7 Other (SPECIFY) 18/3
- 8 (DO NOT READ) Don't know
- 9 (DO NOT READ) Refused

**(M1115/N1081 Q.D4a/O1086 – D4a)**

**(ASK IF D3=1)**

D4a. Were you born in the United States, on the island of Puerto Rico, or in another country?

**18/4**

- 1 U.S.
- 2 Puerto Rico
- 3 Another country
- 9 (DO NOT READ) Refused



**(M1115/N1081 Q.D5/O1086 – D5)**

**(ASK EVERYONE)**

D5. In politics today, do you consider yourself a Republican, a Democrat, an Independent, or something else?

(ENTER ONE ONLY)

**18/5**

- 1 Democrat
- 2 Republican
- 3 Independent
- 4 Something else
- 8 (DO NOT READ) Don't know
- 9 (DO NOT READ) Refused/prefer not to answer

**(M1115/N1081 Q.L1/O1086 – L1)**

**(ASK IF LANDLINE SAMPLE)**

L1. Now thinking about your telephone use. . . Does anyone in your household including yourself, have a working cell phone?

**18/6**

- 1 Yes respondent or someone else has cell phone in household
- 2 No
- 8 (DO NOT READ) Don't Know
- 9 (DO NOT READ) Refused

**(M1115/N1081 Q.C1/O1086 – C1)**

**(ASK IF CELL PHONE SAMPLE)**

C1. Now thinking about your telephone use, is there at least one telephone INSIDE your home that is currently working and is not a cell phone?

**18/7**

- 1 Yes, has a home telephone
- 2 No, no home telephone
- 8 (DO NOT READ) Don't know
- 9 (DO NOT READ) Refused

(NEW)

**(ASK IF CELL PHONE SAMPLE OR HH HAS A CELL PHONE (L1=1))**

(Allow for ZERO)

C3. How many different cell phone numbers do you personally answer calls on?

\_\_\_\_\_ (ENTER # CELL PHONE NUMBERS)

RR (DO NOT READ) Don't know/No answer

(NEW)

**(ASK IF LL SAMPLE OR HH HAS A LL PHONE (C1=1))**

C3a. How many telephone numbers does your household have that I could have reached you on? Not extensions, but different telephone numbers, not counting cell phones?

\_\_\_\_\_ (ENTER # CELL PHONE NUMBERS)

RR (DO NOT READ) Don't know/No answer

**(M1115/N1081 Q.ZIP/O1086 – Zip)**

**(ASK EVERYONE)**

ZIP. What is your zip code?

[IF NECESSARY: Your zip code will help us analyze responses based on which part of [INSERT STATE FROM S1] people are from]

18/8.5 ZIP CODE (ranges: AR = 71600-72999; KY = 40000-42799; TX = 75000-79999)  
99999 (DO NOT READ) Don't know/Refused

**(NEW)**

(ASK IF ZIP9 = 99999; OR NOT IN RANGE)

County. And, in which (county/parish) do you live?

\_\_\_\_\_ (LIST OF COUNTIES)  
99999 (DO NOT READ) Refused

**(NEW)**

(ASK IF QZIP=99999; OR NOT IN RANGE))

USR. Do you live in an urban, suburban or rural area?

- 1 Urban
- 2 Suburban
- 3 Rural
- 8 (DO NOT READ) Don't know
- 9 (DO NOT READ) Refused

**(M1115/N1081 Q.D6/O1086 – D6)**

**(ASK EVERYONE)**

D6. Thinking about your total household income in 2016, NOT including tenants or unrelated roommates, was it:

(READ LIST. ENTER ONE ONLY).

**18/13**

- 1 Under (AMT 1)
- 2 (AMT 1) to (AMT 2)
- 3 More than (AMT 2)
- 8 (DO NOT READ) Don't know
- 9 (DO NOT READ) Refused/prefer not to answer

|             | AMT1 (50%) | AMT2 (100%) |
|-------------|------------|-------------|
| Family Size |            |             |
| 1           | \$5,900    | \$11,900    |
| 2           | \$8,000    | \$16,000    |
| 3           | \$10,100   | \$20,200    |
| 4           | \$12,200   | \$24,300    |
| 5           | \$14,200   | \$28,400    |
| 6           | \$16,300   | \$32,600    |
| 7           | \$18,400   | \$36,700    |

|    |          |          |
|----|----------|----------|
| 8  | \$20,400 | \$40,900 |
| 9  | \$22,500 | \$45,100 |
| 10 | \$24,600 | \$49,200 |
| 11 | \$26,700 | \$53,400 |
| 12 | \$28,800 | \$57,500 |

FOR INTERVIEWER (CELL PHONE SAMPLE ONLY):

INT1. DO NOT READ. Did respondent request money for using their cell phone minutes?

**12/10**

- 1 Yes, requested money
- 9 No, did not request money – GO TO END OF INTERVIEW

(ASK CELL PHONE RESPONDENTS WHO REQUESTED FOR MONEY (INT1=1)):

That's the end of the interview. We'd like to send you \$10 for your time. Can I please have your full name and a mailing address where we can send you the money?

INTERVIEWER NOTE: If R does not want to give full name, explain we only need it so we can send the \$10 to them personally.

- 1 [ENTER FULL NAME] – INTERVIEWER: PLEASE VERIFY  
SPELLING **2/16.25**
- 2 [ENTER MAILING ADDRESS] **19/51**
- 3 [City] **19/52**
- 4 [State] **19/53.2**
- 5 CONFIRM ZIP from above **19/55.5**
- R (VOL.) Respondent does not want the money

(READ TO EVERYONE) THANK YOU VERY MUCH FOR YOUR TIME AND COOPERATION

REGION FROM SAMPLE  
METRO STATUS FROM SAMPLE  
RECORD ENDLANG

**Appendix Table 1.** Comorbid conditions among all respondents and respondents who screen positive for depression, 2013-2016

| Comorbid condition | 2013                 |                 | 2014                 |                 | 2015                 |                 | 2016                 |                 |
|--------------------|----------------------|-----------------|----------------------|-----------------|----------------------|-----------------|----------------------|-----------------|
|                    | Screen +<br>(N=1275) | All<br>(N=2864) | Screen +<br>(N=1203) | All<br>(N=2801) | Screen +<br>(N=1378) | All<br>(N=3011) | Screen +<br>(N=1344) | All<br>(N=2951) |
| Hypertension       | 54%                  | 44%             | 53%                  | 42%             | 54%                  | 45%             | 56%                  | 46%             |
| AMI/CAD            | 15%                  | 12%             | 15%                  | 11%             | 17%                  | 12%             | 17%                  | 12%             |
| Stroke             | 9%                   | 7%              | 8%                   | 5%              | 9%                   | 7%              | 10%                  | 7%              |
| Asthma or COPD     | 38%                  | 27%             | 36%                  | 26%             | 37%                  | 28%             | 38%                  | 28%             |
| Kidney Disease     | 4%                   | 3%              | 5%                   | 3%              | 5%                   | 4%              | 6%                   | 4%              |
| Diabetes           | 26%                  | 21%             | 26%                  | 20%             | 25%                  | 21%             | 26%                  | 20%             |
| Cancer             | 9%                   | 6%              | 8%                   | 6%              | 7%                   | 6%              | 9%                   | 7%              |
| Substance Abuse    | 5%                   | 4%              | 6%                   | 4%              | 6%                   | 4%              | 9%                   | 5%              |

NOTES: Authors' analysis of data from a survey conducted of U.S. citizens aged 19-64 with incomes less than 138% of the federal poverty level. Surveys were conducted from 2013-2016. AMI = acute myocardial infarction (heart attack), CAD = coronary artery disease, COPD = chronic obstructive pulmonary disease.

**Appendix Table 2.** Changes in coverage and access to care After ACA coverage expansion among low-income adults screened positive depression (2014-2016 vs. 2013)

| Outcome                                   | Difference-in-Differences Estimate |           |
|-------------------------------------------|------------------------------------|-----------|
|                                           | %                                  | 95% CI    |
| Has Medicaid Coverage                     | 13**                               | 3 – 22    |
| Has No Health Coverage                    | -22***                             | -29 – -15 |
| Has Private Coverage                      | 8*                                 | 0 – 16    |
| Has a Personal Doctor                     | 11*                                | 2 – 19    |
| Delayed Care due to Cost                  | -11*                               | -21 – -2  |
| Delayed Medications due to Cost           | -18***                             | -27 – -9  |
| Had Trouble getting Appt. with Specialist | 7                                  | -2 – 16   |
| Had Any Office Visit                      | -2                                 | -11 – 8   |
| Was Hospitalized                          | -1                                 | -9 – 7    |
| Had an Emergency Department Visit         | -5                                 | -14 – 3   |

**Notes:** Authors' analysis of data from a survey conducted of U.S. citizens aged 19-64 with incomes less than 138% of the federal poverty level. Surveys were conducted from 2013-2016. N = 4,834 minus any item non-response. Difference-in-differences analyses compare non-expansion states (TX) to expansion states (AR+KY) pre (2013) and post-Medicaid expansion (2014-2016). Coefficients are from the difference-in-differences estimator, displayed as the percentage point change. Linear probability models were controlled for age, gender, race/ethnicity, rurality, political identification, income, marital status, and educational attainment. \*p<0.05; \*\*p<0.01; \*\*\*p<0.001

**Appendix Table 3.** Changes in coverage and access to care After ACA coverage expansion among low-income adults who screened positive for or had a history of depression (2015-2016 vs. 2013)

| Outcome                                   | Difference-in-Differences Estimate |           |
|-------------------------------------------|------------------------------------|-----------|
|                                           | %                                  | 95% CI    |
| Has Medicaid Coverage                     | 13*                                | 3 – 22    |
| Has No Health Coverage                    | -22***                             | -30 – -14 |
| Has Private Coverage                      | 8*                                 | 0 – 15    |
| Has a Personal Doctor                     | 10*                                | 0 – 20    |
| Delayed Care due to Cost                  | -15**                              | -24 – -6  |
| Delayed Medications due to Cost           | -15***                             | -22 – -7  |
| Had Trouble getting Appt. with Specialist | 7                                  | -1 – 15   |
| Had Any Office Visit                      | .1                                 | -8 – 9    |
| Was Hospitalized                          | 1                                  | -6 – 9    |
| Had an Emergency Department Visit         | -5                                 | -14 – 3   |

**Notes:** Authors' analysis of data from a survey conducted of U.S. citizens aged 19-64 with incomes less than 138% of the federal poverty level. Surveys were conducted from 2013-2016. N = 6,155 minus any item non-response. Difference-in-differences analyses compare non-expansion states (TX) to expansion states (AR+KY) pre (2013) and post-Medicaid expansion (2015-2016). 2014 was included in the regression specification but was treated as a transition year. Coefficients are from the difference-in-differences estimator, displayed as the percentage point change. Linear probability models were controlled for age, gender, race/ethnicity, rurality, political identification, income, marital status, and educational attainment. \*p<0.05; \*\*p<0.01; \*\*\*p<0.001

**Appendix B.** Difference-in-differences regression equation for coverage and access to care-related outcomes

Each outcome in the regression below is dichotomous. Models with dichotomous outcomes and interactions between covariates, such as difference-in-differences models, are best modeled as a linear probability model, rather than a logistic or probit regression. (See Karaca-Mandic and Norton in reference list.) For each outcome, we conducted the following regression for our primary analysis:

$$y_{it} = \alpha + \delta_{2014} * 2014_t + \delta_{post} * Post_t + \gamma * Expansion_i + \lambda_{2014} * 2014_t * Expansion_i + \lambda_{post} * Post_t * Expansion_i + \mathbf{X}_i\boldsymbol{\beta} + \epsilon_{it}$$

$y_{it}$  = the outcome for respondent,  $i$ , in time,  $t$

$2014_t$  = a dummy variable for 2014 (0 = not 2014, 1 = 2014)

$Post_t$  = a dummy variable for 2015 or 2016 (0 = not 2015 or 2016, 1 = 2015 or 2016)

$Expansion_i$  = an intervention dummy variable (0 = non expansion state, 1 = expansion state)

$\mathbf{X}_i$  = a vector of demographic covariates for respondent,  $i$

$\epsilon_{it}$  = the stochastic error term for respondent,  $i$ , at time,  $t$

Standard errors are clustered at the county-level, which is the level at which survey-weighting is done for this analysis.
